# Supplementary material for: Porous bipolar polymers as organic cathodes for sustainable sodium/potassium-ion batteries
Source: Royal Society of Chemistry journal article supplement (doi:10.1039/d3ta02445h), 2023-01-01
Supplement: d3ta02445h1.pdf [file d3ta02445h1.pdf]

*Supporting information*

**Porous Bipolar Polymers as Organic Cathodes for Sustainable Sodium/Potassium-ion Batteries**

Motahareh Mohammadiroudbari,<sup>a</sup> Jinghao Huang,<sup>a</sup> Eric Youngsam Kim,<sup>a</sup> Zhenzhen Yang,<sup>b</sup> Fu Chen,<sup>c</sup> and Chao Luo<sup>\*a,d</sup>

<sup>a</sup>Department of Chemistry and Biochemistry, George Mason University, Fairfax, VA, 22030, USA

<sup>b</sup>Materials Science Division, Argonne National Laboratory, Lemont, IL, 60439, USA

<sup>c</sup>Department of Chemistry and Biochemistry, University of Maryland, College Park, MD, 20742, USA

<sup>d</sup>Quantum Science & Engineering Center, George Mason University, Fairfax, VA, 22030, USA

\*Corresponding author: cluo@gmu.edu

(a)

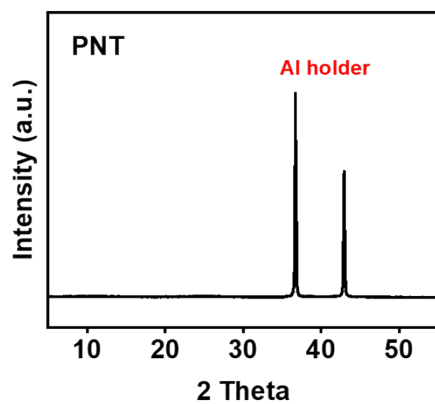

(b)

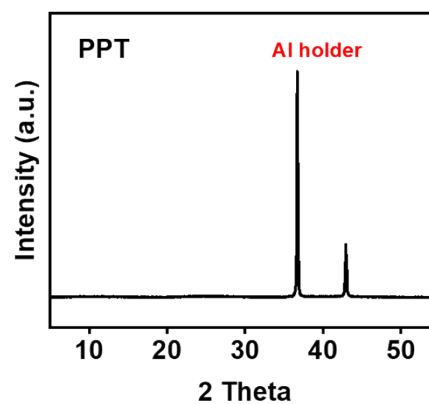

(c)

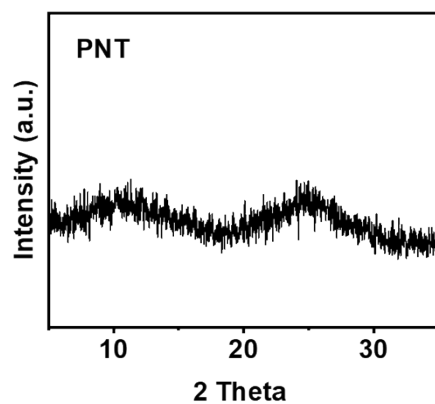

(d)

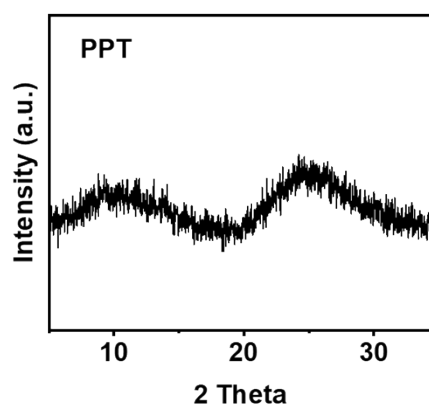

**Fig. S1** XRD spectra for PNT and PPT.

(a)

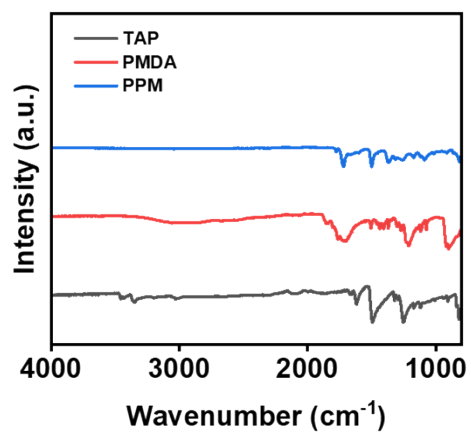

(b)

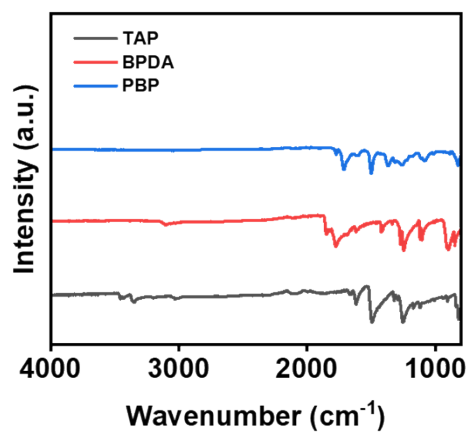

Fig. S2 FTIR spectra for PPM and PBP.

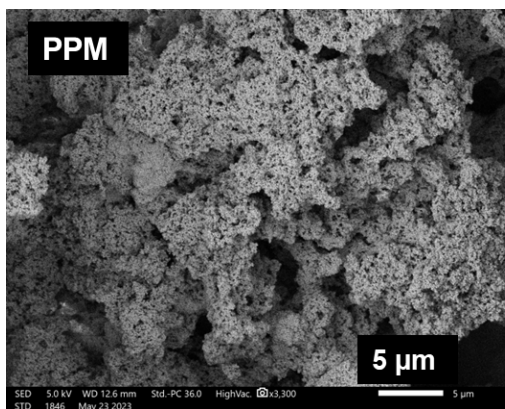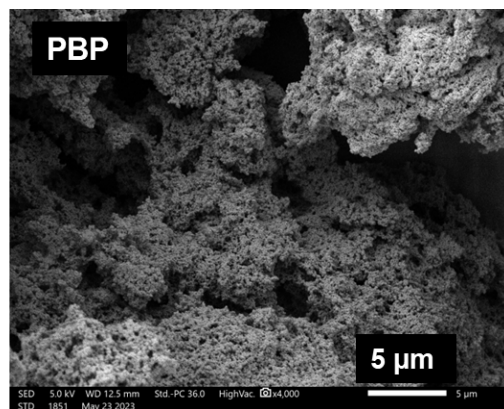

**Fig. S3** SEM images for PPM and PBP

**Table S1** BET results for the four mesoporous polymers.

| Measurement \ Polymers                | PNT    | PPT  | PMP    | PBP    |
|---------------------------------------|--------|------|--------|--------|
| BET surface area (m <sup>2</sup> /g)  | 167.00 | 1.22 | 312.58 | 187.33 |
| Adsorption average pore diameter (nm) | 5.26   | 13.6 | 6.27   | 11.71  |
| Desorption average pore diameter (nm) | 5.59   | 10.2 | 6.21   | 11.64  |

(a)

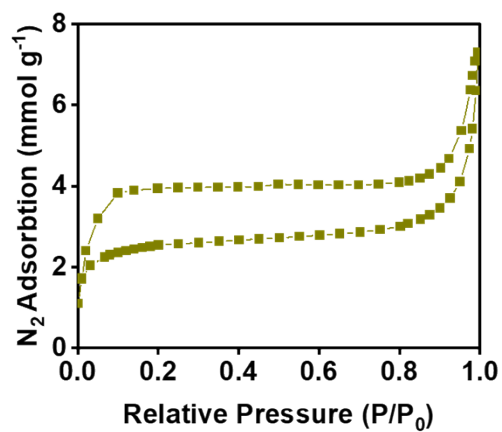

(b)

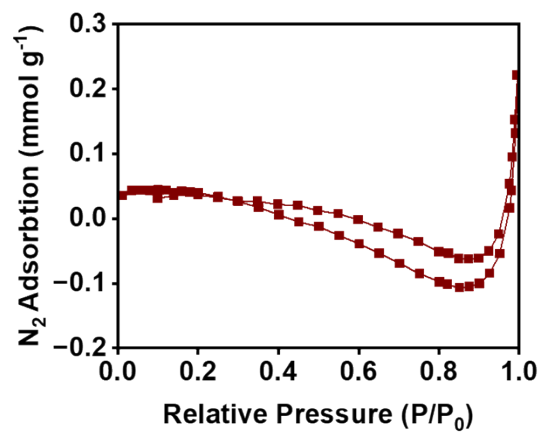

(c)

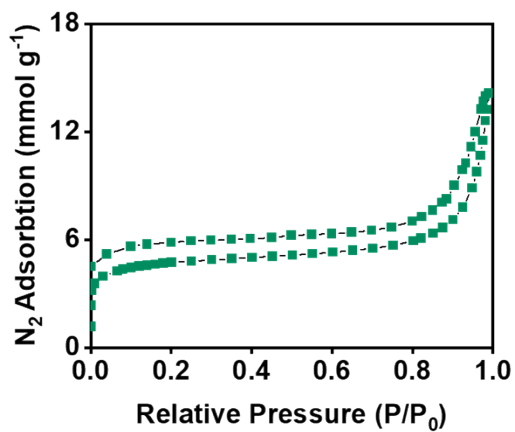

(d)

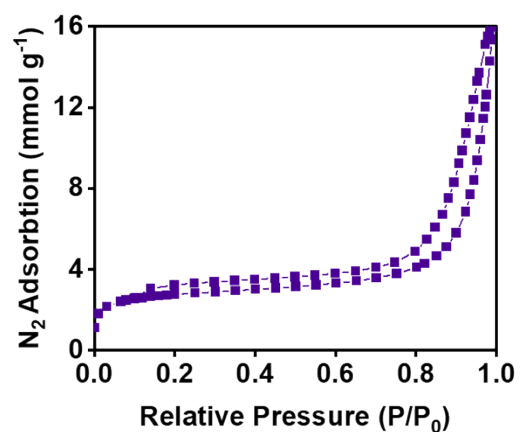

**Fig. S4** Adsorbed  $N_2$  as a function of relative pressure for mesoporous polymers: (a) PNT, (b) PPT, (c) PPM, (d) PBP.

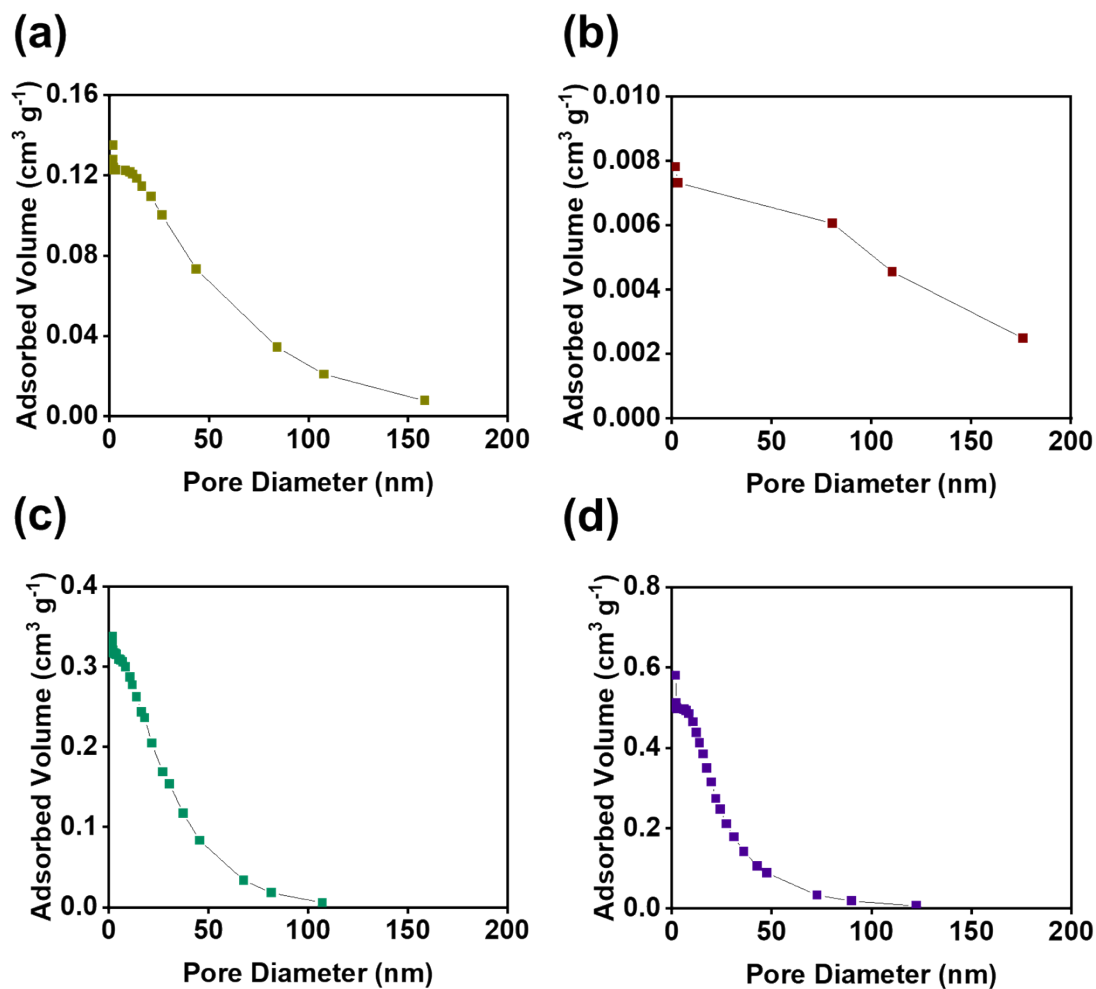

**Fig. S5** Pore size distribution for mesoporous polymers: (a) PNT, (b) PPT, (c) PPM, (d) PBP.

(a)

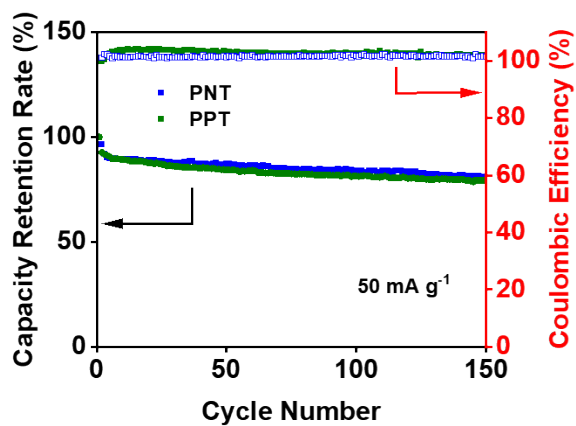

(b)

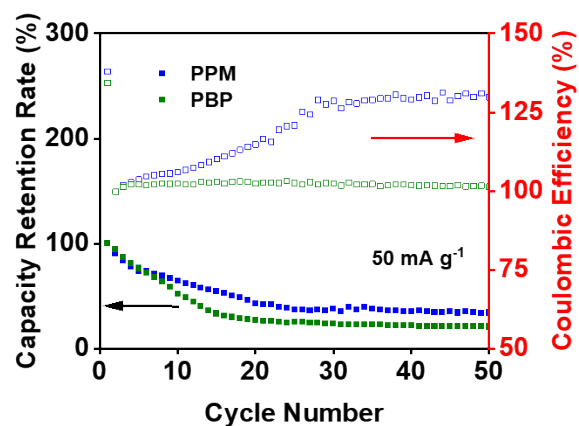

Fig. S6 Capacity retention in NIBs: (a) PNT and PPT, (b) PPM and PBP.

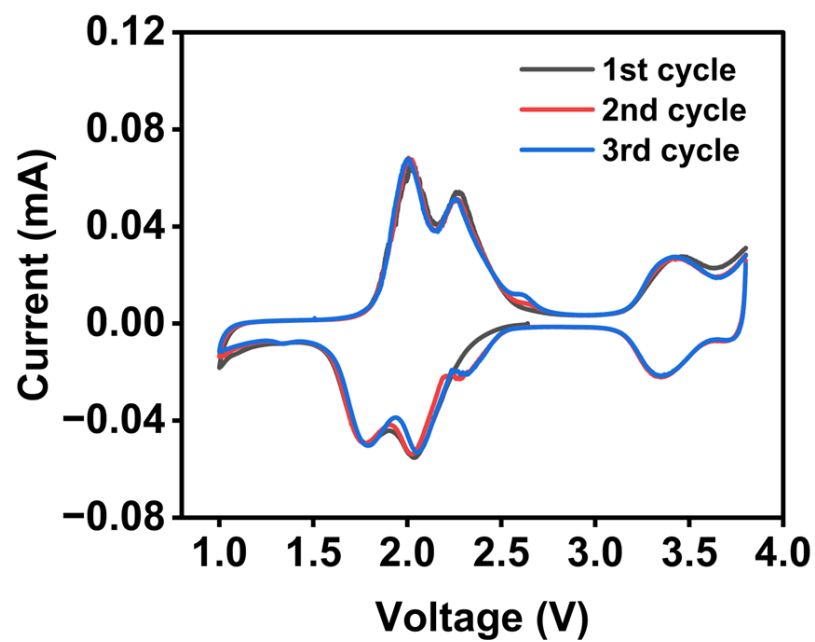

**Fig. S7** Cyclic voltammogram for PNT/single-layer graphene at the scan rate of  $0.1 \text{ mV s}^{-1}$  in NIBs.

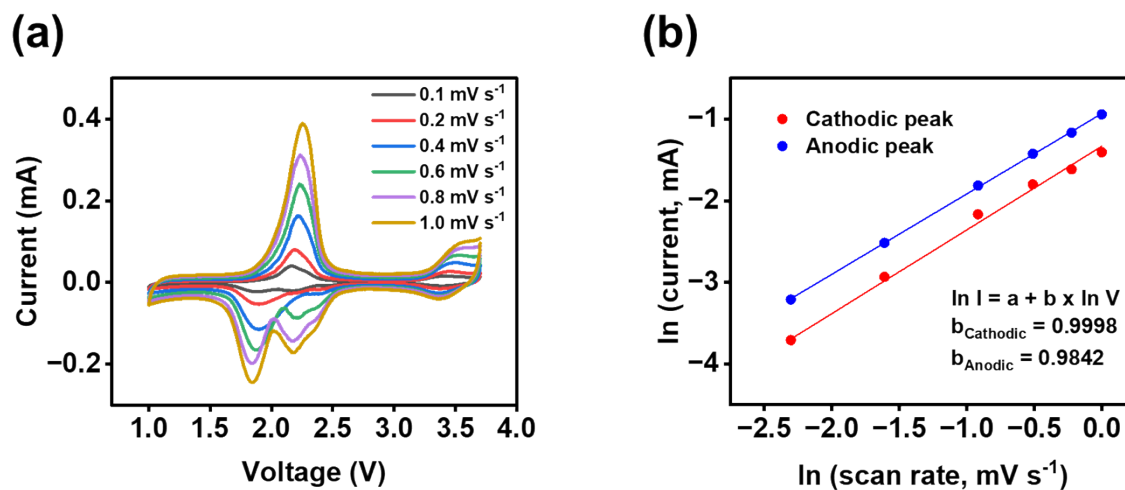

**Fig. S8** Reaction kinetics for PPT/single-layer graphene in NIBs: (a) cyclic voltammograms at scan rates of 0.1-1 mV s<sup>-1</sup>, (b) the natural logarithm of peak current versus scan rate.

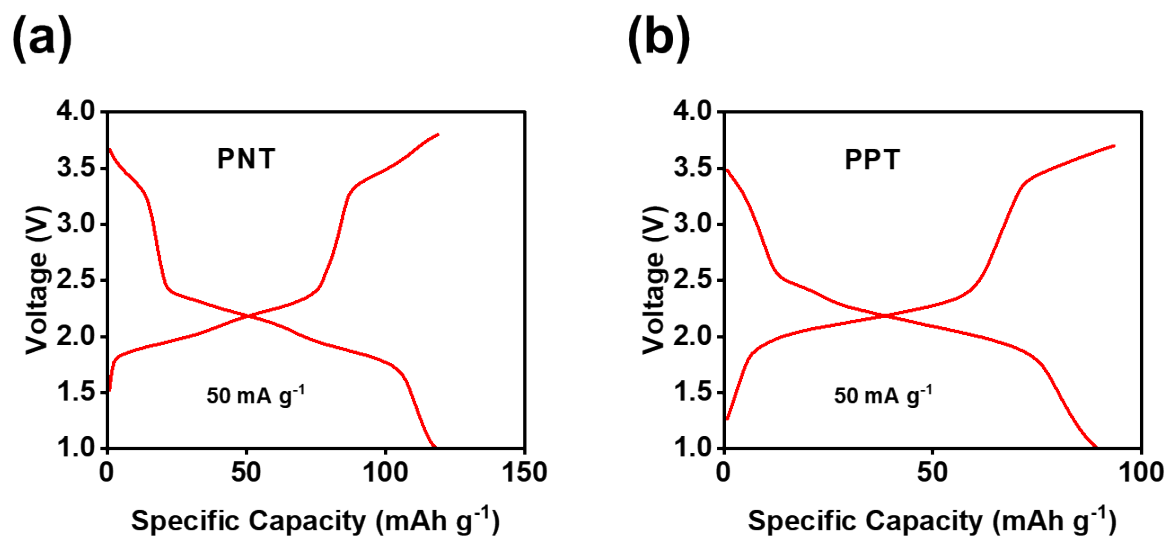

**Fig. S9** Galvanostatic charge–discharge curves at the 150<sup>th</sup> cycle in NIBs: (a) PNT, (b) PPT.

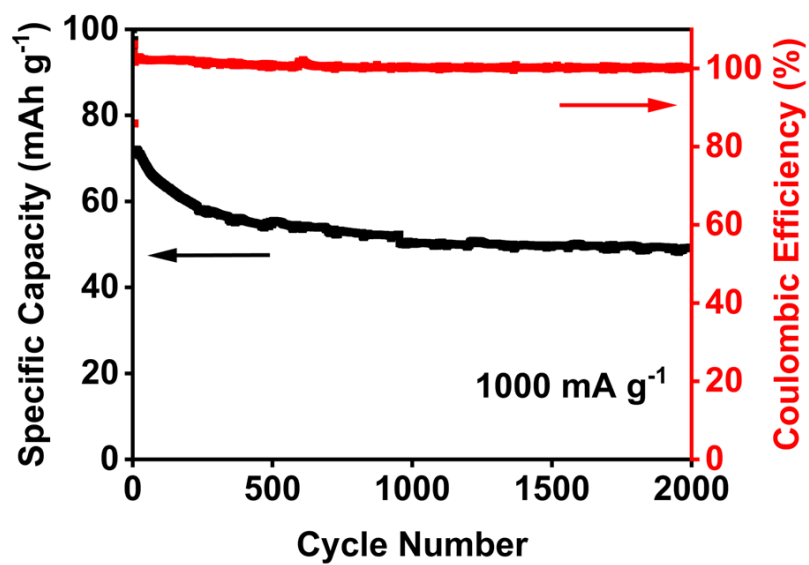

**Fig. S10** De-sodiation capacity and Coulombic efficiency for PPT/single-layer graphene at the scan rate of 1,000 mA g<sup>-1</sup> in NIBs.

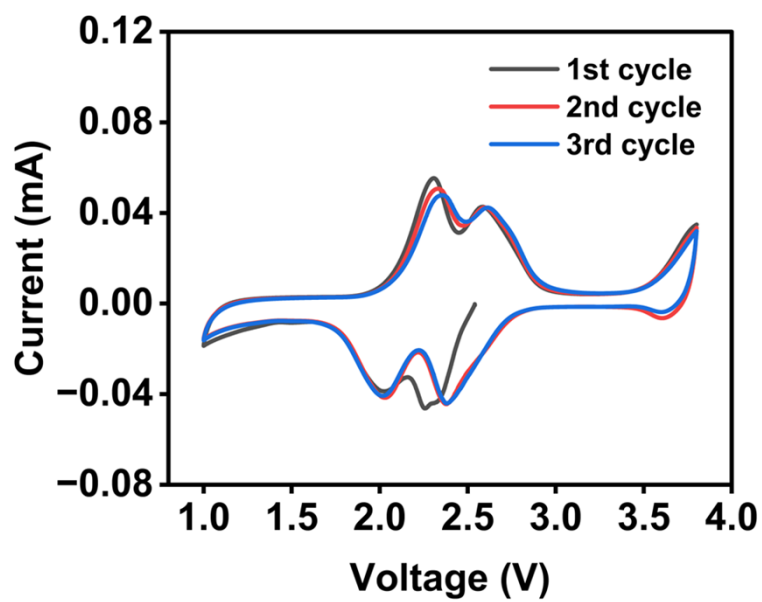

**Fig. S11** Cyclic voltammogram for PNT/single-layer graphene at the scan rate of  $0.1 \text{ mV s}^{-1}$  in KIBs.

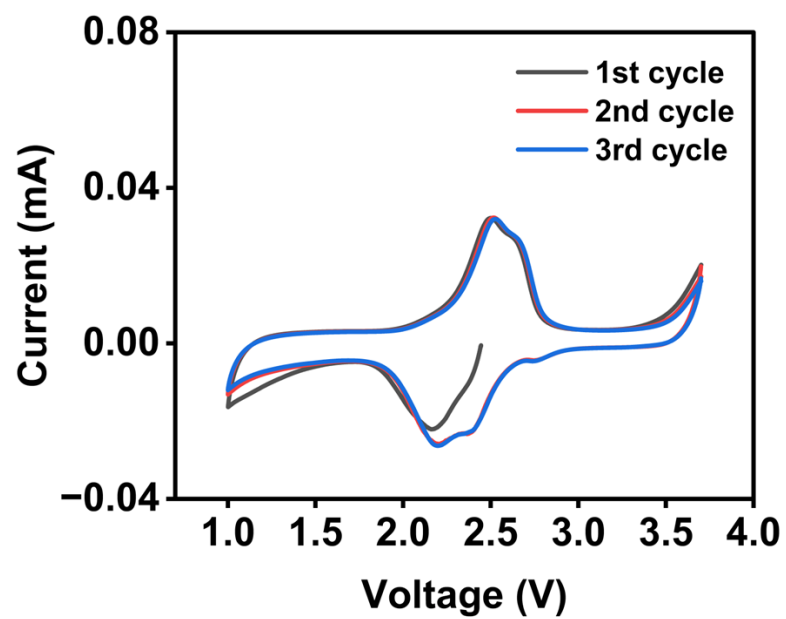

**Fig. S12** Cyclic voltammogram for PPT/single-layer graphene at scan rates of  $0.1 \text{ mV s}^{-1}$  in KIBs.

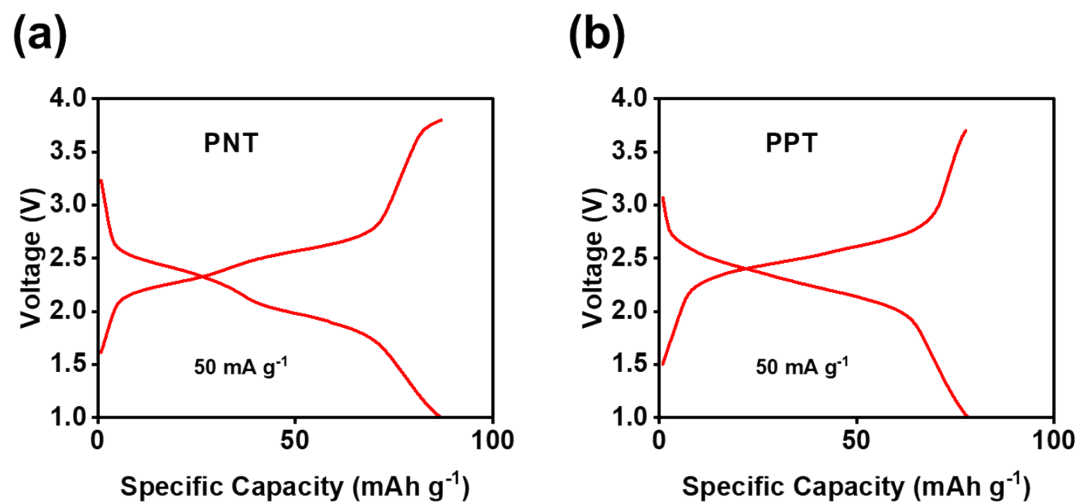

**Fig. S13** Galvanostatic charge–discharge curves at the 150<sup>th</sup> cycle in KIBs: (a) PNT, (b) PPT.

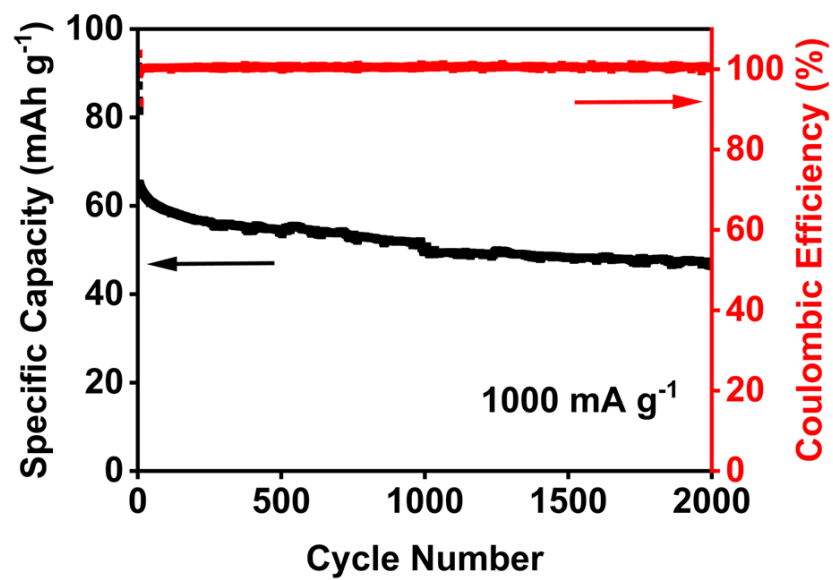

**Fig. S14** De-potassiation capacity and Coulombic efficiency for PPT/single-layer graphene in KIBs.

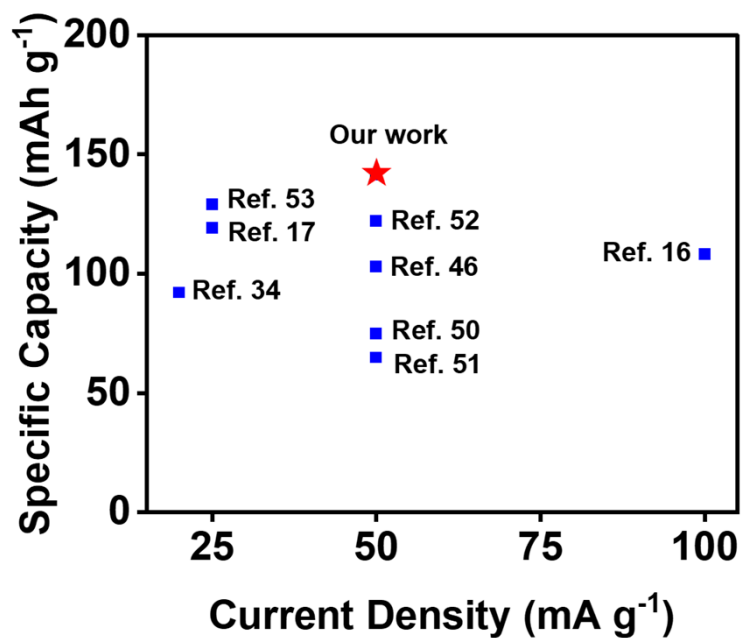

**Fig. S15** Summary plot for the comparison of the specific capacity of our designed polymer with the previously reported organic compounds in alkali-ion batteries. Data from references 16, 17, 34, 46, 50, 51, 52, 53, and this work.

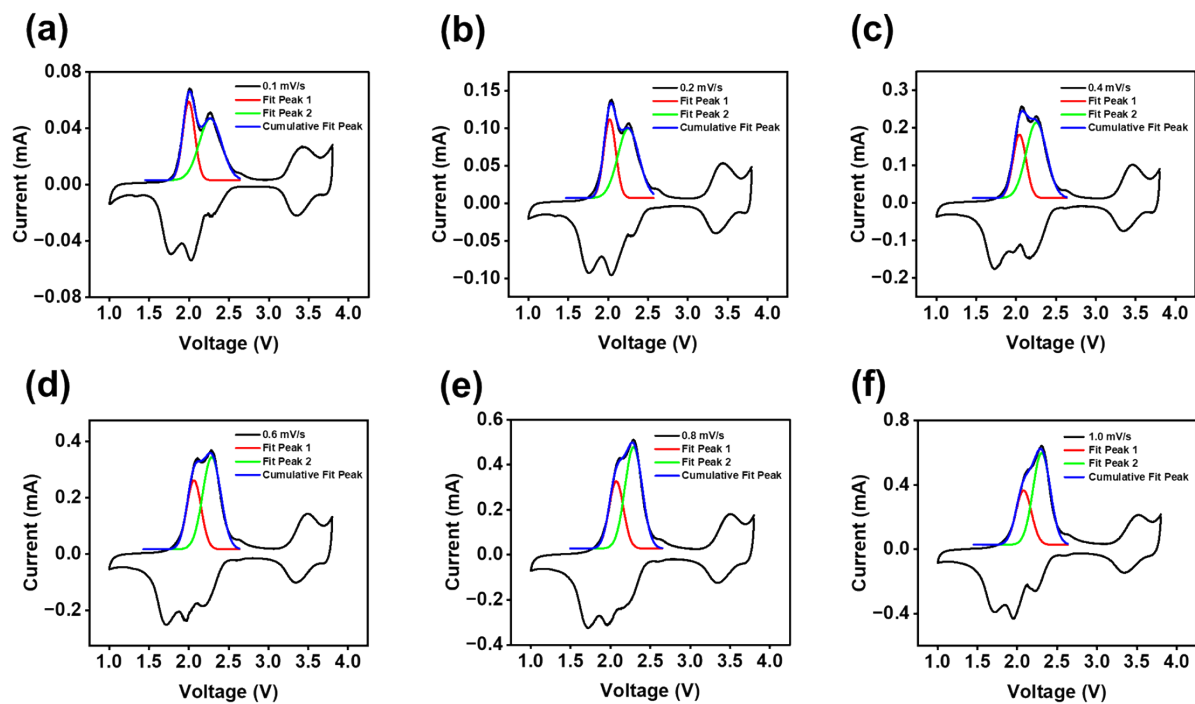

**Fig. S16** Anodic peak deconvolution on cyclic voltammograms at different scan rates for PNT with single-layer graphene in NIBs.

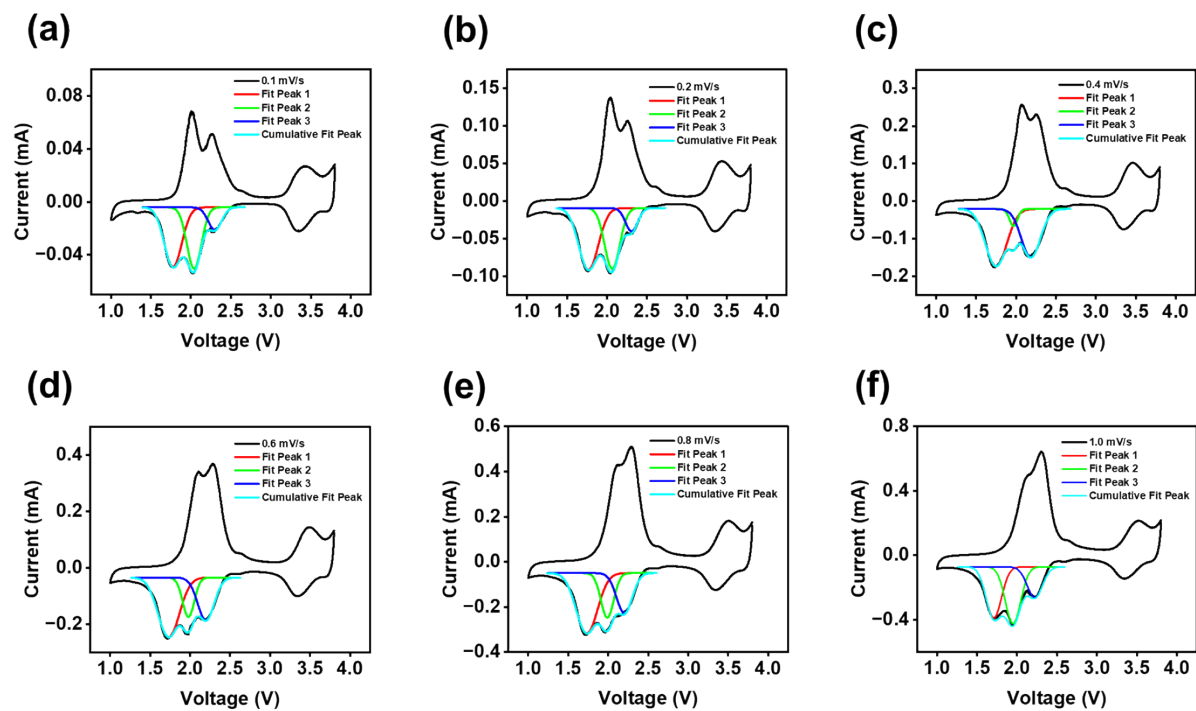

**Fig. S17** Cathodic peak deconvolution on cyclic voltammograms at different scan rates for PNT with single-layer graphene in NIBs.

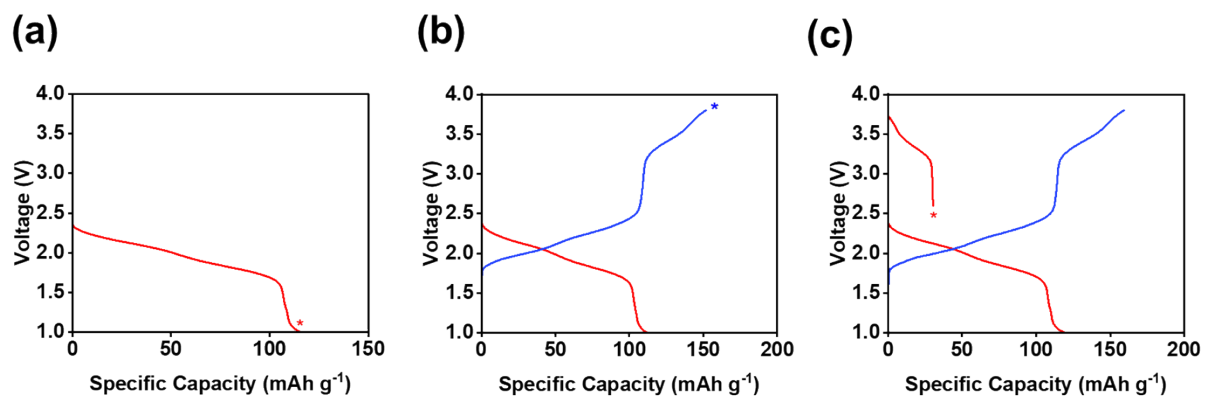

**Fig. S18** Different stages of charge/discharge for the PNT electrode tested at the current density of 20 mA g<sup>-1</sup> for XPS analyses: (a) discharged to 1 V, (b) charged to 3.8 V, discharged to 2.6 V.

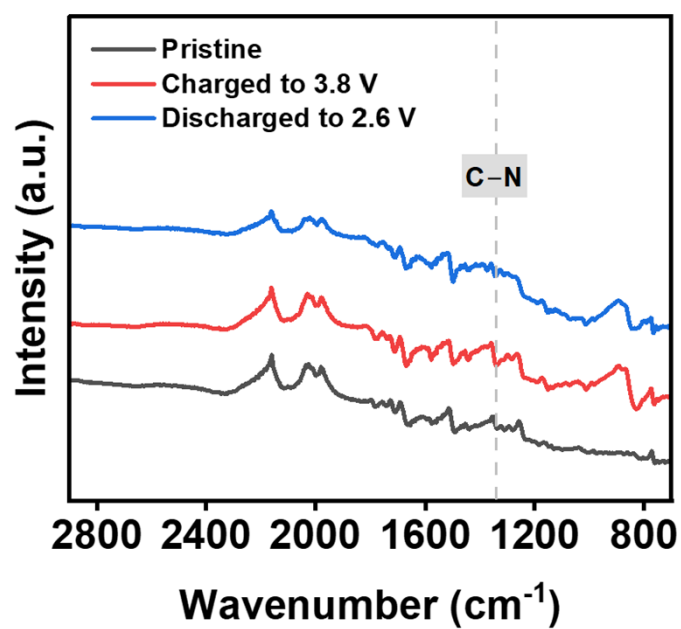

**Fig. S19** FTIR spectra of the pristine and charged/discharged PNT electrodes.

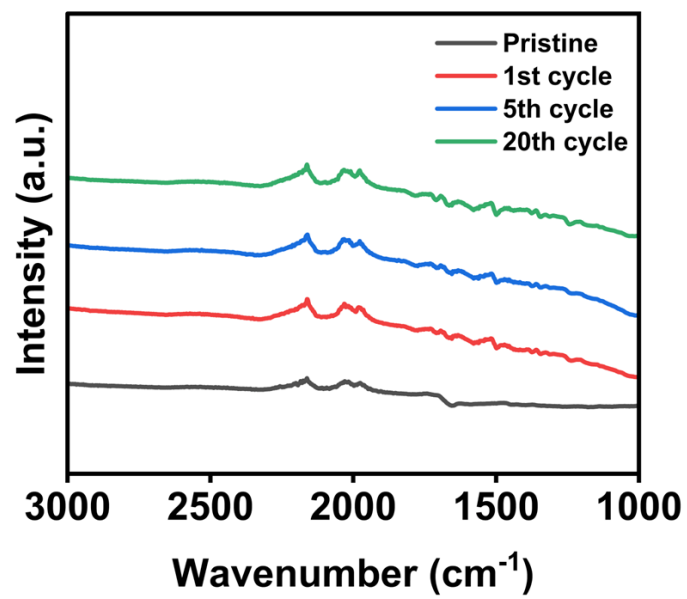

**Fig. S20** FTIR spectra for PNT cathodes in NIBs after cycling.
